# Supplementary material for: Enhancing potassium-ion battery performance by defect and interlayer engineering
Source: Royal Society of Chemistry journal article supplement (doi:10.1039/c8nh00305j), 2018-10-09
Supplement: c8nh00305j1.pdf [file c8nh00305j1.pdf]

**Electronic Supplementary Information for**

**Enhancing potassium-ion battery performance by defect and  
interlayer engineering**

Yang Xu,<sup>†\*a</sup> Farzaneh Bahmani,<sup>†ab</sup> Min Zhou,<sup>a</sup> Yueliang Li,<sup>c</sup> Chenglin Zhang,<sup>a</sup> Feng Liang,<sup>d</sup>  
Sayed Habib Kazemi,<sup>b</sup> Ute Kaiser,<sup>c</sup> Guowen Meng <sup>\*c</sup> and Yong Lei <sup>\*a</sup>

<sup>a</sup>Fachgebiet Angewandte Nanophysik, Institut für Physik & ZMN MacroNano (ZIK), Technische Universität Ilmenau, Ilmenau 98693, Germany

<sup>b</sup>Department of Chemistry, Institute for Advanced Studies in Basic Sciences, Zanjan 45137, Iran

<sup>c</sup>Central Facility for Electron Microscopy, Electron Microscopy Group of Materials Science, Ulm University, Ulm 89081, Germany

<sup>d</sup>State Key Laboratory of Complex Nonferrous Metal Resources Clean Utilization, Kunming University of Science and Technology, Kunming 650093, China

<sup>e</sup>Institute of Solid State Physics, Chinese Academy of Sciences, Hefei, Anhui 230031, China

<sup>†</sup>These authors contributed equally.

Corresponding authors:

Dr. Yang Xu: yang.xu@tu-ilmenau.de

Prof. Guowen Meng: gwmeng@issp.ac.cn

Prof. Yong Lei: yong.lei@tu-ilmenau.de

## Experimental details

*Materials synthesis:* MoS<sub>2</sub> nanoflowers were synthesized using a hydrothermal method. In a typical procedure, 1 mmol (NH<sub>4</sub>)<sub>6</sub>Mo<sub>7</sub>O<sub>24</sub>·4H<sub>2</sub>O was dissolved in 35 ml DI water under stirring, and different amounts of thiourea were added to the solution. The obtained solution was kept stirring for 0.5 h and then transferred to a Teflon-lined stainless-steel autoclave. The autoclave was sealed and maintained at 210°C for 24 h. After cooling to room temperature naturally, the product was collected by centrifuging the mixture, rinsed with absolute ethanol several times, and then dried in vacuum at 60°C. Interlayer-expanded and defect-rich MoS<sub>2</sub> was synthesized using 60 mmol thiourea, and defect-free MoS<sub>2</sub> was synthesized using 14 mmol thiourea.

*Characterizations:* Characterizations of the samples were carried out by X-ray diffractometry (D/MAX2500V PC diffractometer, Cu K $\alpha$   $\lambda$  = 1.54 Å), Raman spectroscopy (inVia Raman microscope), X-ray photoelectron spectroscopy (Thermo SCIENTIFIC ESCALAB 250Xi), scanning electron microscopy (Hitachi S4800), FEI Titan 80-300 aberration-corrected transmission electron microscopy (80 kV).

*Electrochemical measurements:* The electrodes were fabricated by mixing the active material, Super P and poly(vinylidenedifluoride) (PVDF) at a weight ratio of 70:20:10, then coated uniformly (doctor-blade) on a copper foil with a mass loading of ~1.0 mg cm<sup>-2</sup>. The electrodes were dried at 110°C under vacuum for more than 12 h. Electrochemical tests were carried out using coin cells, CR2032, which were assembled in a nitrogen-filled glovebox with oxygen and moisture concentrations kept below 0.1 ppm. K foil used as counter electrode was separated from working electrode by a glass microfiber filter (Whatman, Grade GF/B). The electrolyte was 1 M potassium bis(fluorosulfonyl)imide (KFSI) in an ethylene carbonate (EC)/diethylene carbonate (DEC) solution (1:1). Cyclic voltammetry and electrochemical galvanostatic intermittent titration were performed on a VSP electrochemical workstation (Bio-Logic, France). Electrodes were

discharged at a series of current density of  $20 \text{ mA g}^{-1}$  pulses for 15 min and left on open circuit for 2 h relaxation after each pulse to reach an equilibrium potential. Galvanostatic charge/discharge was performed on a Land CT 2001A battery testing system (Land, China) at room temperature.

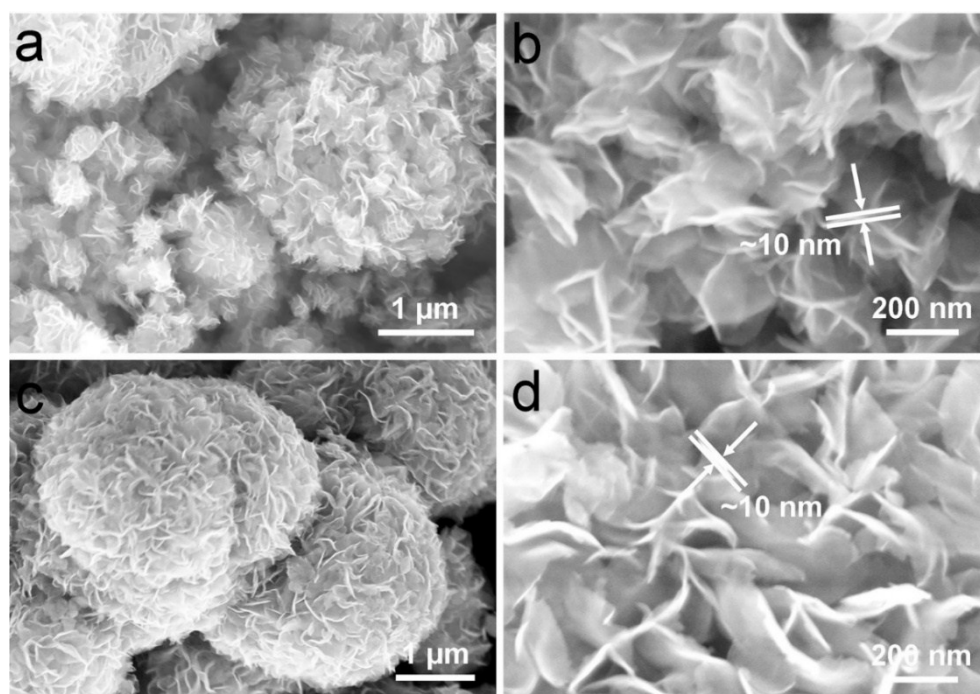

**Fig. S1.** SEM images of D-MoS<sub>2</sub> NFs (a and b) and MoS<sub>2</sub> NFs (c and d).

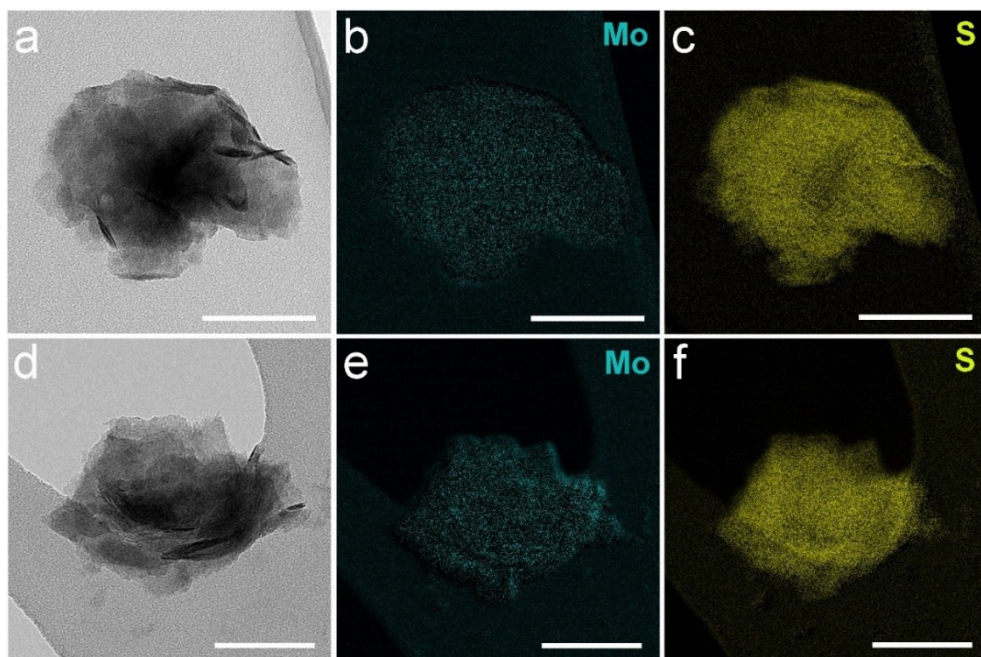

**Fig. S2.** TEM bright-field images of D-MoS<sub>2</sub> NFs (a) and MoS<sub>2</sub> NFs (d). Three-window elemental maps of D-MoS<sub>2</sub> NFs (b: Mo; c: S) and MoS<sub>2</sub> NFs (e: Mo; f: S). Scale bars: 100 nm.

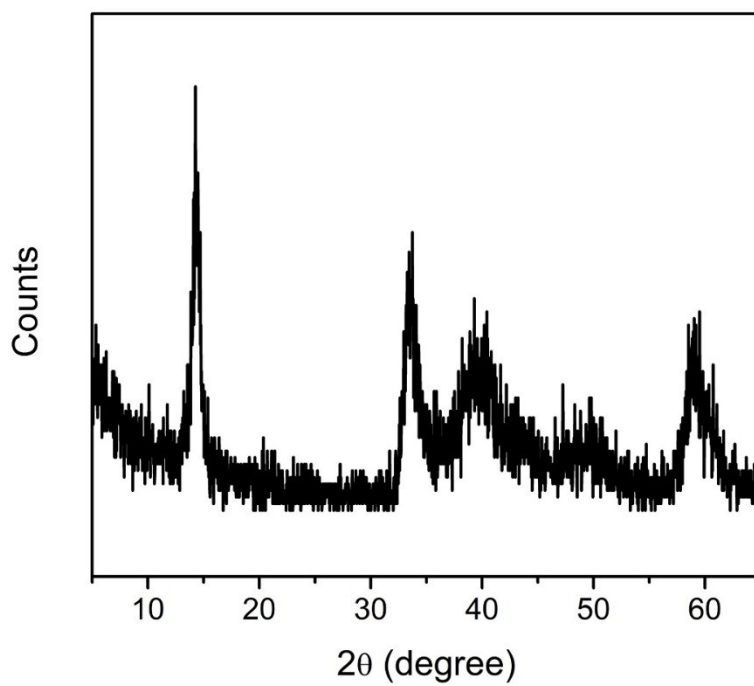

**Fig. S3.** XRD pattern of D-MoS<sub>2</sub> NFs after annealing at 700°C for 3 h.

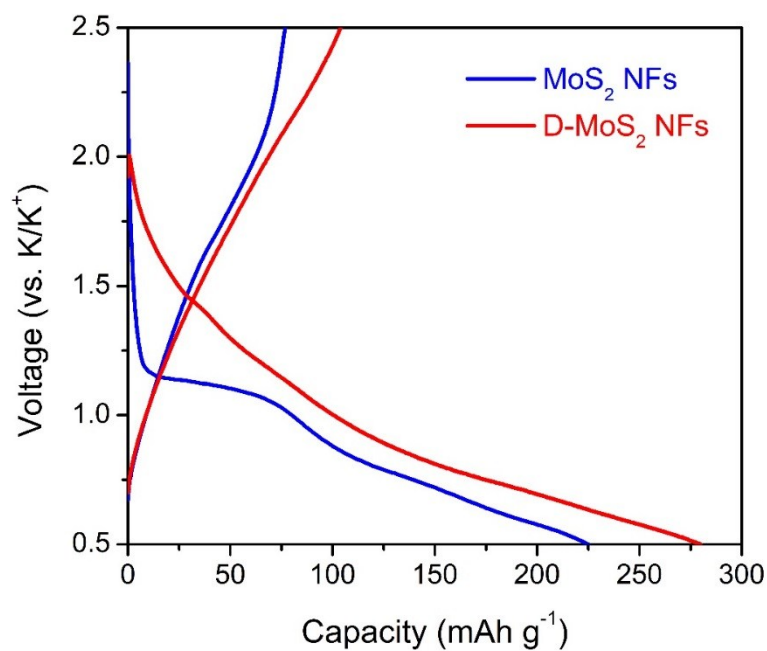

**Fig. S4.** Discharge-charge profiles of D-MoS<sub>2</sub> and MoS<sub>2</sub> NFs at cycle1.

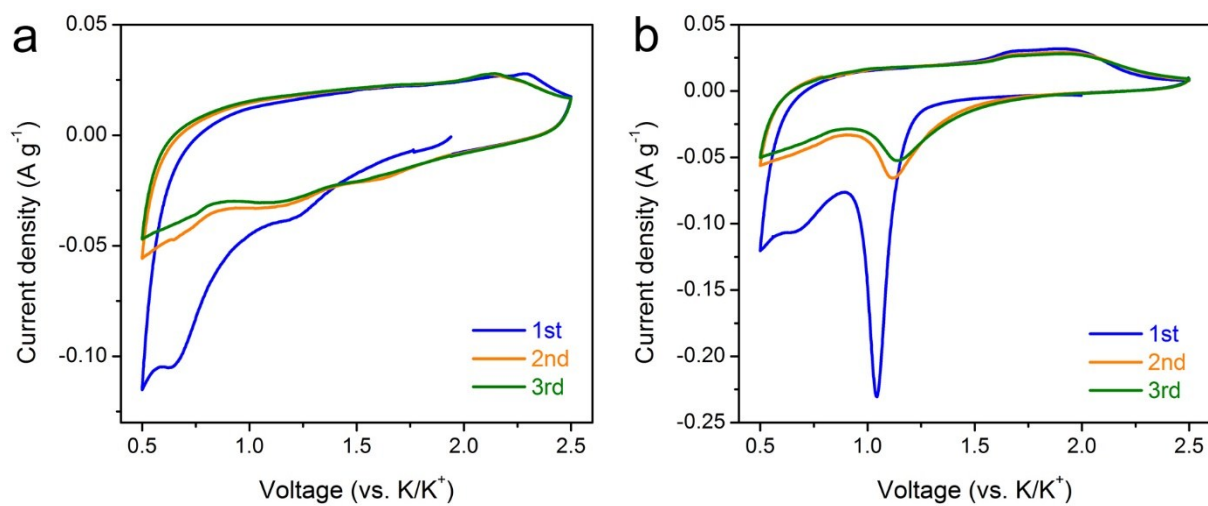

**Fig. S5.** CV curves of D-MoS<sub>2</sub> NFs (a) and MoS<sub>2</sub> NFs (b).

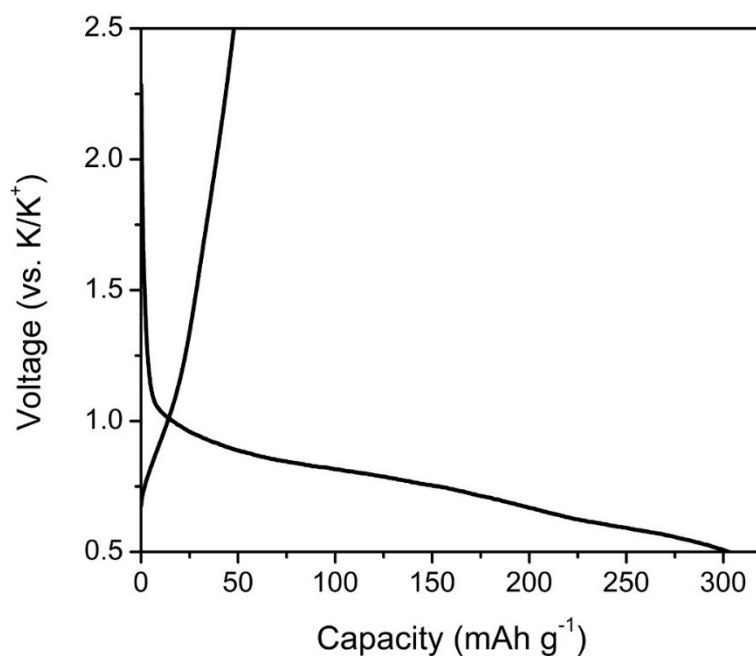

**Fig. S6.** Discharge-charge profiles of Super P at cycle 1. The electrode was prepared by mixing Super P and PVDF using a weight ratio of 2:1. The discharge and charge capacities are 303 and 48 mAh g<sup>-1</sup>, giving a CE of 16%.

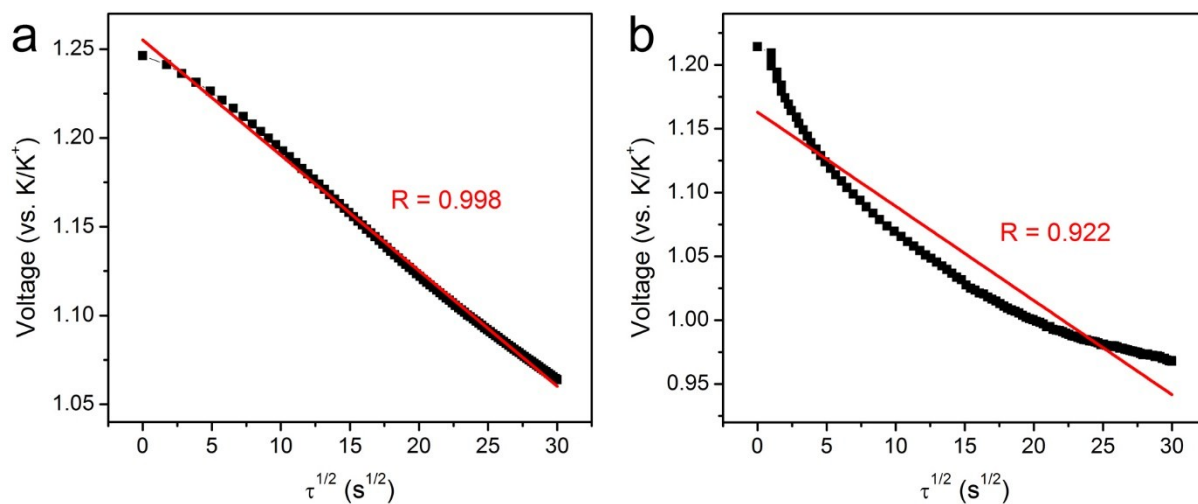

**Fig. S7.** The relationship between the voltage change and the square root of relaxation time for D-MoS<sub>2</sub> NFs at 1.33 V (a) and MoS<sub>2</sub> NFs at 1.51 V (b). The relationship is linear or quasi-linear, which is the prerequisite for the calculation of  $D_k$ , as described in the next figure.

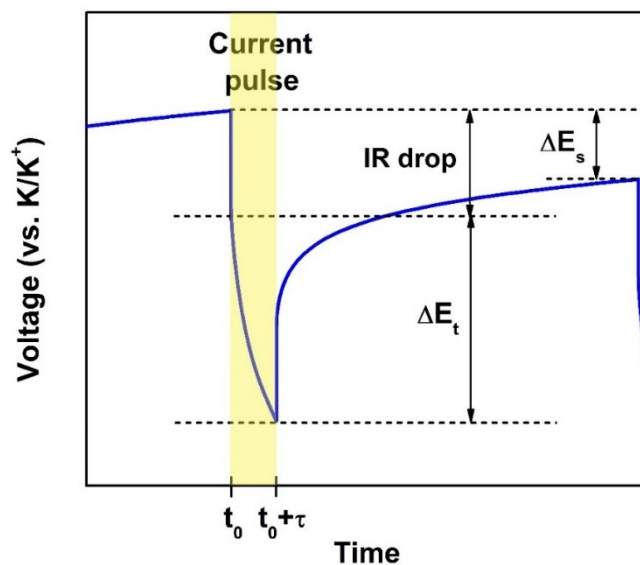

**Fig. S8.** Schematic of the calculation of diffusion coefficient using the GITT technique.

The diffusion coefficient is calculated according to the following equation if the cell potential is linearly proportional to  $\tau^{1/2}$ :<sup>1,2</sup>

$$D = \frac{4}{\pi\tau} \left( \frac{m_b V_M}{M_B S} \right)^2 \left( \frac{\Delta E_s}{\Delta E_t} \right)^2 \quad (t \ll \frac{L^2}{D})$$

where  $\tau$  is the current pulse time (s),  $m_b$  is the mass of the active material,  $M_B$  is the molar mass of the active material,  $V_M$  is the molar volume of the active material,  $S$  is the geometric area of the electrode, and  $\Delta E_s$  and  $\Delta E_t$  are defined as shown in the figure.

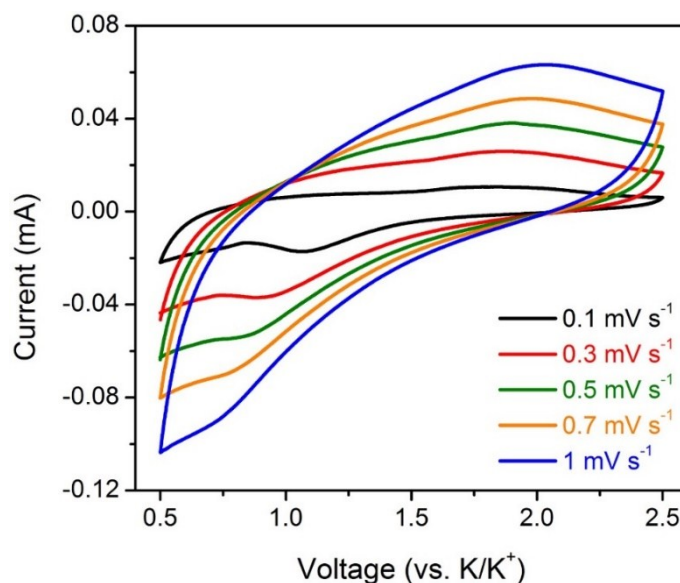

**Fig. S9.** CV curves of MoS<sub>2</sub> NFs at various scan rates.

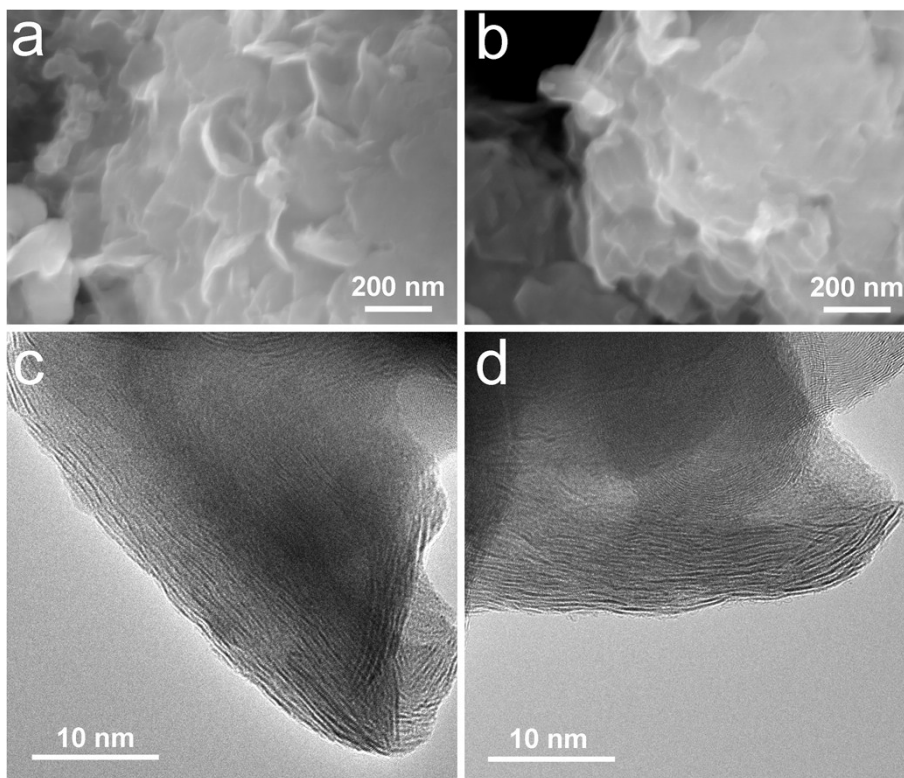

**Fig. S10.** SEM (a and b) and TEM (c and d) of D-MoS<sub>2</sub> NFs (a and c) and MoS<sub>2</sub> NFs (b and d) after 100 cycles.

## References

- [1] W. Weppner and R. A. Huggins, *J. Solid State Chem.*, 1977, **22**, 297-308.
- [2] Z. Jian, Z. Xing, C. Bommier, Z. Li and X. Ji, *Adv. Energy Mater.*, 2016, **6**, 1501874.
